1 **Antifungal activity of fibrate-based compounds and substituted pyrroles inhibiting the**  
2 **enzyme 3-hydroxy-methyl-glutaryl-CoA reductase of *Candida glabrata* (CgHMGR),**  
3 **and decreasing yeast viability and ergosterol synthesis**

4  
5 Damián A. Madrigal-Aguilar,<sup>a\*</sup> Adilene Gonzalez-Silva,<sup>b\*</sup> Blanca Rosales-Acosta,<sup>b</sup> Celia  
6 Bautista-Crescencio,<sup>b</sup> Jossué Ortiz-Álvarez,<sup>b</sup> Carlos H. Escalante,<sup>a</sup> Jaime Sánchez-  
7 Navarrete,<sup>c</sup> César Hernández-Rodríguez,<sup>b</sup> Germán Chamorro-Cevallos,<sup>d</sup> Joaquín  
8 Tamariz,<sup>a\*\*</sup> Lourdes Villa-Tanaca<sup>b\*\*</sup>.

9 <sup>a</sup> Departamento de Química Orgánica, Escuela Nacional de Ciencias Biológicas, Instituto  
10 Politécnico Nacional, Prol. Carpio y Plan de Ayala S/N, CP 11340, Mexico City, Mexico.,  
11 MX.

12 <sup>b</sup> Departamento de Microbiología, Escuela Nacional de Ciencias Biológicas, Instituto  
13 Politécnico Nacional, Prol. Carpio y Plan de Ayala S/N, CP 11340, Mexico City, Mexico.

14 <sup>c</sup> Laboratorio de Investigación Microbiológica, Hospital Juárez de México, Av. Instituto  
15 Politécnico Nacional Núm. 5160, México City, Mexico.

16 <sup>d</sup> Departamento de Farmacia, Escuela Nacional de Ciencias Biológicas, Instituto  
17 Politécnico Nacional, Prol. Carpio y Plan de Ayala S/N, CP 11340, México City, Mexico.

18 \* Both authors contributed to the same extent

19 \*\*Corresponding authors:

20 Lourdes Villa-Tanaca. Email: [mvillat@ipn.mx](mailto:mvillat@ipn.mx); [lourdesvillatanaka@gmail.com](mailto:lourdesvillatanaka@gmail.com)

21 *Laboratorio de Biología Molecular de Bacterias y Levaduras, Departamento de*  
22 *Microbiología, Escuela Nacional de Ciencias Biológicas, Instituto Politécnico Nacional,*  
23 *Prol. de Carpio y Plan de Ayala. Col. Sto. Tomás, 11340 Mexico City, Mexico.*

24 Joaquín Tamariz. Email: [jtamarizm@gmail.com](mailto:jtamarizm@gmail.com). *Departamento de Química Orgánica,*  
25 *Escuela Nacional de Ciencias Biológicas, Instituto Politécnico Nacional, Prol. de Carpio y*  
26 *Plan de Ayala. Col. Sto. Tomás, 11340 Mexico City, Mexico.*

27

28

## 29 **ABSTRACT**

30 Due to the emergence of multi-drug resistant strains of yeasts belonging to the *Candida*  
31 genus, there is an urgent need to discover antifungal agents directed at alternative molecular  
32 targets. The aim of the current study was to evaluate the capacity of synthetic compounds to  
33 inhibit the *Candida glabrata* enzyme denominated 3-hydroxy-methyl-glutaryl-CoA  
34 reductase (CgHMGR), and thus affect ergosterol synthesis and yeast viability. One series of  
35 synthetic antifungal compounds were analogues to fibrates, a second series had substituted  
36 1,2-dihydroquinolines and the third series included substituted pyrroles.  $\alpha$ -asarone-related  
37 compounds **1c** and **5b** with a pyrrolic core were selected as the best antifungal candidates.  
38 Both inhibited the growth of fluconazole-resistant *C. glabrata* 43 and fluconazole-  
39 susceptible *C. glabrata* CBS 138. A yeast growth rescue experiment based on the addition  
40 of exogenous ergosterol showed that the compounds act by inhibiting the mevalonate  
41 synthesis pathway. A greater recovery of yeast growth occurred for the *C. glabrata* 43 strain  
42 and after the **1c** (versus **5b**) treatment. Given that the compounds decreased the ergosterol  
43 concentration in the yeast strains, they probably target the ergosterol synthesis. According to  
44 the docking analysis, the inhibitory effect of the **1c** and **5b** could possibly be mediated by  
45 their interaction with the amino acid residues of the catalytic site of CgHMGR. Since **1c**  
46 displayed higher binding energy than  $\alpha$ -asarone and **5b**, it is a good candidate for further

47 research, which should include structural modifications to increase its specificity and potency  
48 as well as *in vivo* studies on its effectiveness at a therapeutic dose.

49

## 50 **KEYWORDS**

51 HMGR, ergosterol, fibrates, pyrroles, atorvastatin, synthetic antifungal, *Candida*, multi-  
52 drug resistance.

53

## 54 **HIGHLIGHTS**

55

- 56 1) Fibrate-based and pyrrole-containing compounds were tested as *C. glabrata* inhibitors.
- 57 2) The best inhibitor from fibrate was **1c** and from pyrroles was **5b**.
- 58 3) These agents inhibited *C. glabrata* growth better than the reference antifungals.
- 59 4) They also inhibited ergosterol synthesis by the two *C. glabrata* strains tested.

60 Experimental

61

## 62 **ABBREVIATIONS**

|    |        |                                                                    |
|----|--------|--------------------------------------------------------------------|
| 63 | ANOVA  | analysis of variance                                               |
| 64 | CgHMGR | 3-hydroxy-methyl-glutaryl-CoA reductase in <i>Candida glabrata</i> |
| 65 | CLSI   | Clinical and Laboratory Standards Institute                        |
| 66 | DHE    | dihydroxy-ergosterol                                               |
| 67 | DMSO   | dimethyl sulfoxide                                                 |
| 68 | HMGR   | 3-hydroxy-methyl-glutaryl-CoA reductase                            |
| 69 | KOH    | potassium hydroxide                                                |
| 70 | NBS    | <i>N</i> -bromosuccinimide                                         |
| 71 | SD     | standard deviation                                                 |
| 72 | YPD    | yeast extract-peptone-dextrose medium                              |
| 73 |        |                                                                    |

## 74 **INTRODUCTION**

75 The emergence of multi-drug resistant strains of *Candida* yeasts in recent years has made  
76 infections by these pathogens a more serious problem [1]. Although *Candida albicans* (*C.*  
77 *albicans*), *C. glabrata*, *C. tropicalis*, *C. parapsilosis* and *C. krusei* are species isolated from

78 healthy individuals, they can behave as invasive opportunistic pathogens under host  
79 conditions of a compromised immune system.

80 Among the particularly important *Candida* species with multi-drug resistance are *C.*  
81 *auris*, the species of the *C. haemulonii* complex, and *C. glabrata*. The former two cause in-  
82 hospital outbreaks and polymicrobial infections associated with SARS-Cov-2 [2,3]. *C.*  
83 *glabrata* is intrinsically resistant to azoles, and the recent pan-echinocandin-resistant strains  
84 of this species are also associated with the COVID-19 pandemic [4]. *C. glabrata* has been  
85 proposed as a model for the study of statins as antifungal agents [5].

86 Three main mechanisms of antifungal action have been found to date for antifungal  
87 agents: an alteration of the fungal membrane by the binding of polyenes to ergosterol, of the  
88 synthesis of ergosterol by the activity of azoles, allylamines and thiocarbamates, and of the  
89 generation of the cell wall by echinocandins [6]. A possible alternative target is 3-hydroxy-  
90 methyl-glutaryl-CoA (HMGR), an enzyme that catalyzes the synthesis of mevalonate, one of  
91 the critical steps in the ergosterol biosynthesis pathway [7-10]. The purpose of developing  
92 new antifungals with alternative molecular targets is to provide a wide range of compounds  
93 to respond to the multi-drug resistance of *Candida* spp. and other fungi.

94 The aim of the present study was to evaluate the capacity of new synthetic compounds  
95 to inhibit the *C. glabrata* HMGR enzyme (CgHMGR) and therefore affect ergosterol  
96 synthesis and yeast viability. Two series of compounds were derived from fibrate-based acyl-  
97 and alkyl-phenoxyacetic methyl esters, and 1,2-dihydroquinolines [11] and a third series  
98 from substituted pyrroles [12,13]. The best compound in each series was subjected to *in vitro*  
99 experiments to assess yeast growth, the level of ergosterol, and yeast growth rescue with the

100 addition of exogenous ergosterol. The experimental data was complemented with docking  
101 simulations.

102

## 103 **RESULTS**

### 104 **Selection of the best CgHMGR inhibitors**

105 An evaluation was made of the possible antifungal activity of the thirteen compounds of  
106 series 1 and 2 and the seven compounds of series 3. The controls were the DMSO solvent  
107 and two compounds ( $\alpha$ -asarone and fluconazole, at different concentrations) that reduce the  
108 synthesis of ergosterol in *C. glabrata* ([Supplementary Figure 1](#)) ([Figure 1](#)). The best  
109 inhibition of the growth of *C. glabrata* in solid YPD medium was exhibited by derivative **1c**  
110 (of series 1 and 2), and the substituted pyrrole derivate **5b** (of series 3) ([Supplementary Figure](#)  
111 [1](#)) ([Figure 1](#)).

112

### 113 **The HMGR inhibitors affect the viability of *Candida glabrata***

114 The phenotype of the strains was verified, being *C. glabrata* CBS 138 and *C. glabrata* 43,  
115 susceptible and resistant to fluconazole, respectively. Once this was established, an  
116 evaluation was made of the *in vitro* antifungal activity of **1c**, **5b**,  $\alpha$ -asarone (from which **1c**  
117 is structurally related), and atorvastatin (an HMGR inhibitor and from which **5b** is  
118 structurally related). Both test compounds (**1c** and **5b**) and reference compounds ( $\alpha$ -asarone  
119 and atorvastatin) were able to diminish the viability of the two strains of *C. glabrata*. **1c** at  
120 75  $\mu\text{g/mL}$  provided growth inhibition similar to atorvastatin and  $\alpha$ -asarone at the same  
121 concentration, reducing yeast growth by up to 90% for the two strains. It was necessary to  
122 apply 300  $\mu\text{g/mL}$  of **5b** to afford a similar percentage of inhibition ([Figure 1](#)) ([Figure 2](#)). As

123 the concentration of the compound increased, the growth of the yeast strains decreased  
124 (Tables 1 and 2), indicating a dose-response effect. Compound **1c** presented lower IC<sub>50</sub> and  
125 IC<sub>70-90</sub> values than its control ( $\alpha$ -asarone), **5b** and atorvastatin (Table 3).  
126

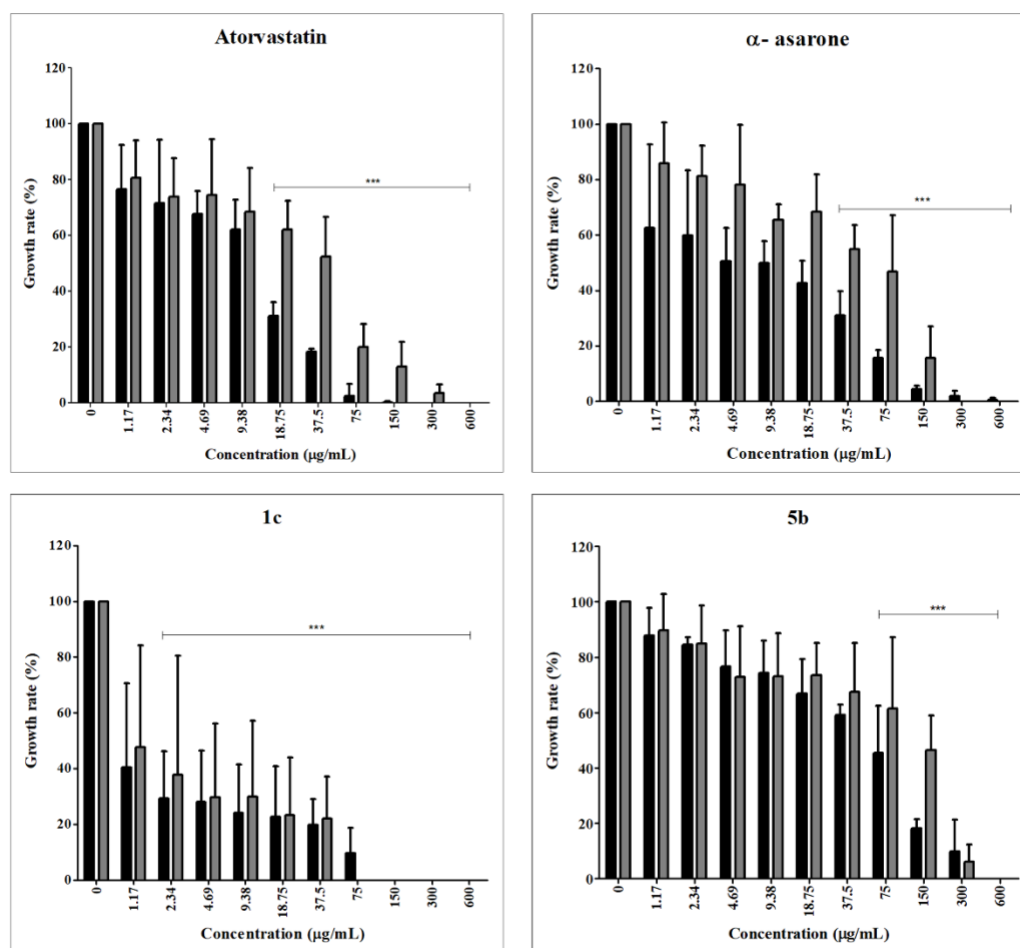

127

128 **Figure 1.** Inhibition of the growth of *Candida glabrata* CBS 138 (black bars) and *C. glabrata*  
129 43 (gray bars) by HMGR inhibitors (antifungal reference and test compounds). As a control,  
130 the strains were grown without any inhibitor. The optical density was determined in a Thermo  
131 Scientific™ Multiskan™ FC microplate photometer at 620 nm. Growth rate values are  
132 expressed as the average of three independent assays  $\pm$  SD. Significant differences were  
133 analyzed by two-way ANOVA. \*\*\*P<0.001.

134

135 **Table 1**

136 Effect of 1c, 5b,  $\alpha$ -asarone and atorvastatin on the growth of *Candida glabrata* CBS 138.

137

138

| Inhibitor concentration ( $\mu\text{g/mL}$ ) | Inhibition (% of relative growth $\pm$ SD) <sup>a</sup> |                    |                    |                    |
|----------------------------------------------|---------------------------------------------------------|--------------------|--------------------|--------------------|
|                                              | Atorvastatin                                            | $\alpha$ -asarone  | 1c                 | 5b                 |
| 0                                            | 0                                                       | 0                  | 0                  | 0                  |
| 1.17                                         | 23.4 $\pm$ 15.8                                         | 37.4 $\pm$ 30.2    | 59.4 $\pm$ 29.9    | 12.3 $\pm$ 10.1    |
| 2.34                                         | 28.5 $\pm$ 22.6                                         | 40 $\pm$ 23.3      | 70.6 $\pm$ 16.9*** | 15.4 $\pm$ 2.5     |
| 4.69                                         | 32.5 $\pm$ 8.3                                          | 49.5 $\pm$ 12.1    | 71.9 $\pm$ 18.2*** | 23.4 $\pm$ 13.1    |
| 9.38                                         | 38 $\pm$ 10.6                                           | 50.2 $\pm$ 8.0     | 75.9 $\pm$ 17.5*** | 25.7 $\pm$ 11.7    |
| 18.75                                        | 68.9 $\pm$ 5.0***                                       | 57.4 $\pm$ 8.1     | 77.3 $\pm$ 18.2*** | 33.3 $\pm$ 12.5    |
| 37.5                                         | 81.8 $\pm$ 1.1***                                       | 68.9 $\pm$ 8.7***  | 80.1 $\pm$ 9.3***  | 41.0 $\pm$ 3.9     |
| 75                                           | 97.5 $\pm$ 4.2***                                       | 84.2 $\pm$ 2.8***  | 90.4 $\pm$ 9.1***  | 54.6 $\pm$ 17.1*** |
| 150                                          | 100 $\pm$ 0.4***                                        | 95.5 $\pm$ 1.1***  | 100 $\pm$ 0***     | 81.8 $\pm$ 3.4***  |
| 300                                          | 100 $\pm$ 0***                                          | 98.06 $\pm$ 1.9*** | 100 $\pm$ 0***     | 90.1 $\pm$ 11.3*** |
| 600                                          | 100 $\pm$ 0***                                          | 99.51 $\pm$ 0.8*** | 100 $\pm$ 0***     | 100 $\pm$ 0***     |

139

140 <sup>a</sup> The relative growth was calculated as a percentage of the growth detected in the absence of  
 141 any inhibitor (considered as 100%). Data are expressed as the average of three replicates  $\pm$   
 142 SD. Significant differences were analyzed with two-way ANOVA. \*\*\*P<0.001.

143

144  
145  
146  
147  
148  
149  
150  
151  
152  
153  
154

**Table 2**

Effect of 1c, 5b,  $\alpha$ -asarone and atorvastatin on the growth of *Candida glabrata* 43.

| Inhibitor concentration ( $\mu\text{g/mL}$ ) | Inhibition (% of relative growth $\pm$ SD) <sup>a</sup> |                    |                    |                    |
|----------------------------------------------|---------------------------------------------------------|--------------------|--------------------|--------------------|
|                                              | Atorvastatin                                            | $\alpha$ -asarone  | 1c                 | 5b                 |
| 0                                            | 0                                                       | 0                  | 0                  | 0                  |
| 1.17                                         | 19.4 $\pm$ 13.4                                         | 14.2 $\pm$ 14.7    | 52.2 $\pm$ 36.5    | 10.7 $\pm$ 13.1    |
| 2.34                                         | 26.2 $\pm$ 13.7                                         | 18.9 $\pm$ 11.2    | 62.2 $\pm$ 42.7*** | 15.1 $\pm$ 13.7    |
| 4.69                                         | 25.7 $\pm$ 20.1                                         | 21.9 $\pm$ 21.6    | 70.3 $\pm$ 26.5*** | 27.2 $\pm$ 18.3    |
| 9.38                                         | 31.7 $\pm$ 15.8                                         | 34.6 $\pm$ 5.7     | 70.0 $\pm$ 27.1*** | 26.9 $\pm$ 15.5    |
| 18.75                                        | 38.0 $\pm$ 10.2***                                      | 31.7 $\pm$ 13.5    | 76.6 $\pm$ 20.7*** | 26.6 $\pm$ 11.7    |
| 37.5                                         | 47.8 $\pm$ 14.4***                                      | 45.1 $\pm$ 8.72*** | 77.9 $\pm$ 15.0*** | 32.6 $\pm$ 17.7    |
| 75                                           | 80.1 $\pm$ 8.3***                                       | 53.1 $\pm$ 20.3*** | 100 $\pm$ 0***     | 38.5 $\pm$ 25.7*** |
| 150                                          | 87.2 $\pm$ 8.9***                                       | 84.3 $\pm$ 11.5*** | 100 $\pm$ 0***     | 53.7 $\pm$ 12.6*** |
| 300                                          | 96.5 $\pm$ 3.0***                                       | 100 $\pm$ 0***     | 100 $\pm$ 0***     | 93.9 $\pm$ 6.2***  |
| 600                                          | 100 $\pm$ 0***                                          | 100 $\pm$ 0***     | 100 $\pm$ 0***     | 100 $\pm$ 0***     |

155  
156  
157  
158  
159  
160  
161

<sup>a</sup> The relative growth was calculated as a percentage of the growth detected in the absence of any inhibitor (considered as 100%). Data are expressed as the average of three replicates  $\pm$  SD. Significant differences were analyzed with two-way ANOVA. \*\*\*P<0.001.



162

163

164

165

166 **Table 3**

167 MIC<sub>50</sub> and MIC<sub>70-90</sub> values of **1c**, **5b**,  $\alpha$ -asarone and atorvastatin against *Candida glabrata*.

168 The control consisted of the yeast strain cultivated without any inhibitor.

| Inhibitor                          | <i>C. glabrata</i> CBS 138      |                                    | <i>C. glabrata</i> 43           |                                    |
|------------------------------------|---------------------------------|------------------------------------|---------------------------------|------------------------------------|
|                                    | MIC <sub>50</sub> ( $\mu$ g/mL) | MIC <sub>70-90</sub> ( $\mu$ g/mL) | MIC <sub>50</sub> ( $\mu$ g/mL) | MIC <sub>70-90</sub> ( $\mu$ g/mL) |
| <b>Control</b>                     | -                               | -                                  | -                               | -                                  |
| <b>Atorvastatin</b>                | 13                              | 37.5                               | 40.1                            | 195.2                              |
| <b><math>\alpha</math>-asarone</b> | 9.38                            | 113.5                              | 60.5                            | 204.5                              |
| <b>1c</b>                          | <1.17                           | 75                                 | <1.17                           | 58                                 |
| <b>5b</b>                          | 62.3                            | 300                                | 131.7                           | 108.2                              |

169

170

171 **For *Candida glabrata* treated with inhibitors, growth recovered after adding**  
172 **ergosterol**

173 A yeast growth rescue experiment was carried out to verify that the inhibition of the HMGR  
174 enzyme affects the levels of ergosterol, the final product of the biosynthesis pathway ([Figure](#)  
175 [2](#)). The compounds were applied at the sublethal concentrations estimated in the previous  
176 experiment (MIC<sub>70-90</sub>). When exogenous ergosterol was subsequently added to the culture  
177 medium, yeast growth did indeed occur, in contrast to the lack of growth caused by the  
178 inhibitor. In some cases, such as with compound **1c** applied to *C. glabrata* 43, the recovery

179 of yeast growth reached an even higher level than the control (the yeast cultured in the  
180 absence of an inhibitor). Thus, this finding confirmed that the compound derived from  $\alpha$ -  
181 asarone altered the pathway for the production of ergosterol in *C. glabrata*, and more  
182 specifically that it targeted the synthesis of the HMGR enzyme.

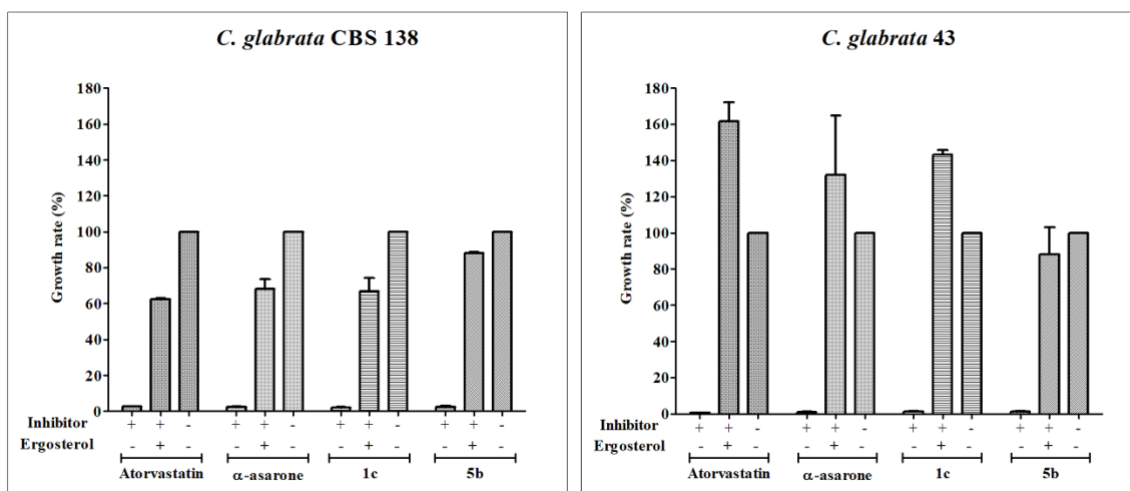

183

184 **Figure 2.** Yeast growth rescue experiment of *Candida glabrata* with ergosterol. After yeast  
185 growth was stopped by treatment with HMGR inhibitors (antifungal reference compounds  
186 and test compounds used at their IC<sub>70-90</sub>), the addition of exogenous ergosterol led to a  
187 recovery of the growth of *C. glabrata* CBS 138 and *C. glabrata* 43. The strains were also  
188 grown without any inhibitor as a control (considered as 100% growth). + represents addition  
189 of the inhibitor or ergosterol to the medium; – indicates the absence of the same. The optical  
190 density was determined in a Thermo Scientific™ Multiskan™ FC microplate photometer at  
191 620 nm. Growth rate values ( $A_{S600}$ ) are expressed as the average of three independent assays  
192  $\pm$  SD. \*\*\*P<0.001 compared to the assay without any inhibitor, based on the Student's *t*-test.

193

194 **The test compounds (CgHMGR inhibitors) affect ergosterol biosynthesis in**

195 *Candida glabrata*

196 To explore the possible association between the loss of viability of *C. glabrata* and the  
197 inhibition of the production of ergosterol, the level of ergosterol in the yeasts was measured  
198 after 18 h of treatment with **1c**, **5b**, simvastatin or  $\alpha$ -asarone (the latter two as reference  
199 compounds; data not shown). The corresponding absorption spectra (Figure 3) contained  
200 the characteristic four peaks of sterols. The test compounds caused a reduction in the level  
201 of sterols in both the fluconazole- susceptibility and -resistant strains of *C. glabrata*.  
202  
203

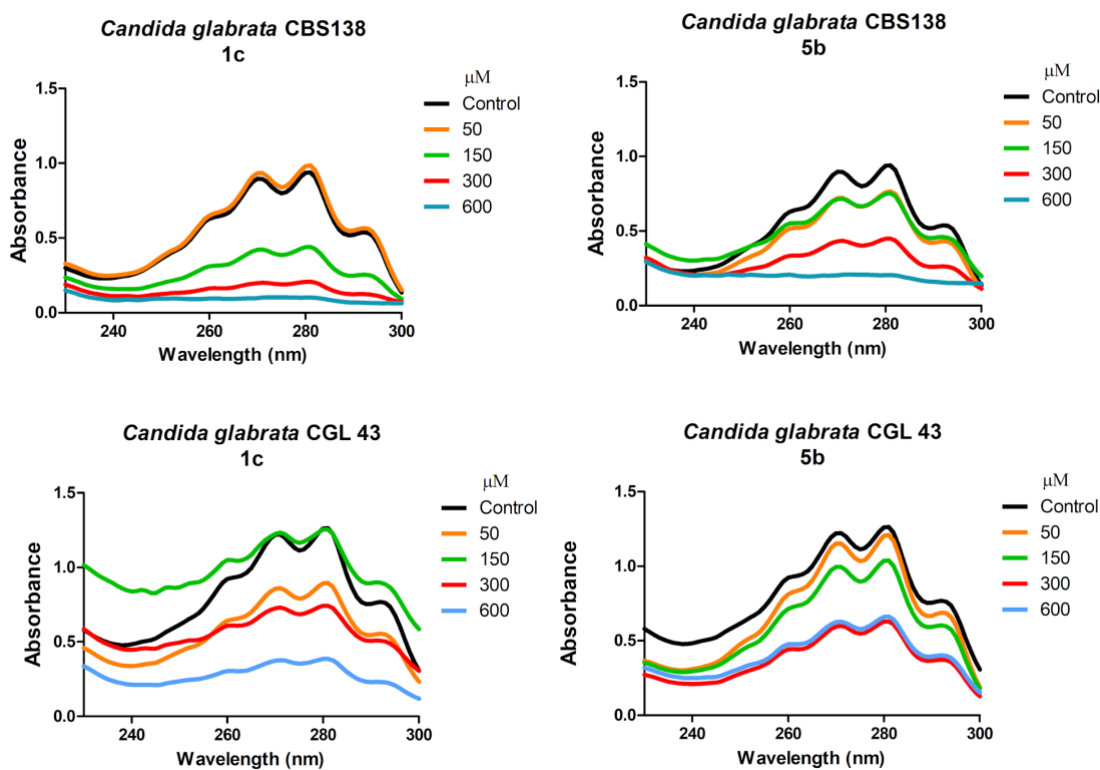

204

205

206 **Figure 3.** CgHMGR inhibitors **1c** and **5b** lowered the level of ergosterol. *C. glabrata*  
207 CBS138 and *C. glabrata* 43 were grown in YPD medium and treated with different  
208 concentrations (50, 100, 300 and 600  $\mu\text{M}$ ) of the inhibitors. The control was the YPD

209 medium without any inhibitor or treated with the vehicle (DMSO) only. By  
210 spectrophotometrically scanning (from 230-300 nm) the extracted sterols (in the n-heptane  
211 layer), the presence or absence of ergosterol could be detected, as well as a possible reduction  
212 in the level of this sterol.

213 The absorption peak corresponding to 281.5 nm was used to quantify the concentration  
214 of ergosterol, allowing for the calculation of the percentage of inhibition of its synthesis  
215 ([Table 4](#)). In general, residual ergosterol levels were higher in the *C. glabrata* 43 versus *C.*  
216 *glabrata* CBS 138 strain. In both strains, a greater decrease in ergosterol was caused by **1c**  
217 than **5b**. Simvastatin and  $\alpha$ -asarone served as positive controls for the inhibition of  
218 CgHMGR, since previous studies demonstrated their capability of inhibiting the recombinant  
219 HMGR of *C. glabrata* [8]. It is observed that the higher the concentration of the inhibitor,  
220 the greater the percentage of inhibition of ergosterol synthesis ([Table 4](#)).

221

222

223

224

225

226

227

228

229

230

231

232

233

234

235

236 **Table 4**

237 Percentage of ergosterol inhibition of *Candida glabrata* cells treated with HMGR enzyme

238 inhibitors.

| <b>Inhibitor</b>                   | <b>Concentration (<math>\mu</math>M)</b> | <b><i>C. glabrata</i> CBS 138</b> | <b><i>C. glabrata</i> 43</b> |
|------------------------------------|------------------------------------------|-----------------------------------|------------------------------|
| <b>Control (W/I)</b>               | -                                        | 100                               | 100                          |
| <b>DMS Control</b>                 | -                                        | 100                               | 100                          |
| <b>Simvastatin</b>                 | 50                                       | 62.3                              | 82.5                         |
|                                    | 150                                      | 19.6                              | 79.9                         |
|                                    | 300                                      | 8.4                               | 67.7                         |
|                                    | 600                                      | 7.9                               | 54.8                         |
| <b><math>\alpha</math>-asarona</b> | 50                                       | 65.2                              | 81.1                         |
|                                    | 150                                      | 36.3                              | 60.4                         |
|                                    | 300                                      | 15.23                             | 53.3                         |
|                                    | 600                                      | 0.00                              | 23.5                         |
| <b>1c</b>                          | 50                                       | 100.0                             | 68.0                         |
|                                    | 150                                      | 40.0                              | 73.2                         |
|                                    | 300                                      | 13.2                              | 44.3                         |
|                                    | 600                                      | 2.3                               | 21.1                         |
| <b>5b</b>                          | 50                                       | 75.6                              | 100.0                        |
|                                    | 150                                      | 67.6                              | 89.6                         |
|                                    | 300                                      | 34.9                              | 50.9                         |
|                                    | 600                                      | 5.1                               | 51.5                         |

239

240 The level of ergosterol was calculated based on the absorbance obtained at 281.5 nm,  
241 expressing it as a percentage of the wet weight of the cells, as described by Arthington-  
242 Skaggs *et al.* [15]. *C. glabrata* was grown in YPD medium treated with different  
243 concentrations (50, 150, 300 and 600  $\mu$ M) of the inhibitors: simvastatin,  $\alpha$ -asarone, **1c** and  
244 **5b**. For the controls, the yeast was grown in YPD medium without any treatment or with  
245 DMSO only. The data represent the average of the three independent assays for each  
246 treatment. The previous results allowed for the calculation of the IC<sub>50</sub>, the concentration of  
247 the inhibitor that causes 50% inhibition of ergosterol synthesis in *C. glabrata* (Supplementary  
248 Table 1). **1c** had lower IC<sub>50</sub> values than **5b** for both the *C. glabrata* CBS 138 (125 and 230  
249  $\mu$ M, respectively) and *C. glabrata* 43 (260 and >600  $\mu$ M, respectively) strains.

250

251 **Docking suggests the interaction of the test compounds with HMGR of *Candida***  
252 ***glabrata***

253 Docking simulations displayed the hypothetical interaction of the compounds with  
254 CgHMGR. The related values for **1c** and **5b** are shown in Table 5. **1c** has the highest binding  
255 energy *in silico*, which correlates with the *in vitro* results (Table 1). Atorvastatin had the  
256 lowest binding energy (Table 5). The interaction of compounds **1c** and **5b** with the amino  
257 acid residues in the catalytic site is depicted in Figure 4. **1c** exhibited hydrogen bonds with a  
258 length of 2.58-2.99 Å between the hydroxyl groups at C-5 and C-8 and Glu93 and Asn192,  
259 respectively, as well as an electrostatic interaction of the O11 methoxy group with Met191.  
260 For **5b**, there were hydrogen bonds 2.19 and 19.7 Å in length between the hydroxyl group at  
261 C-5 and Met191, and between the carboxyl group at C-7 and Asp303, respectively. The  
262 interaction between atorvastatin and the HMGR catalytic site revealed that van der Waals

263 interactions are predominant, although two hydrogen bonds are detected (19.7 and 22.7 Å)  
264 between the carboxyl group at C-17 and Gly341. Additionally, Asp303 interacted by  
265 hydrogen bonds with the carboxyl group at C-17 and the hydroxyl group at C-15 (Figure 4).  
266 The calculated binding energies of **1c** and **5b** (-5.99 and -5.71 kcal/mol, respectively) were  
267 better than those found for  $\alpha$ -asarone and atorvastatin (4.53 and -2.13 kcal/mol, respectively)  
268 (Table 5).





275 simulation was conducted with AUTODOCK 4. In the 2D model obtained by using software,  
276 electrostatic and van der Waals interactions between the amino acid residues and the  
277 compounds are portrayed as red semicircles with rays. Hydrogen bonds are depicted by green  
278 dotted lines, and their size is denoted in Angstroms. C) 3D representation of the docking  
279 complexes between CgHMGR and **1c**, **5b**, and **atorvastatin**. The  $\alpha$ -helix and  $\beta$ -strand  
280 structures are represented as ribbons, colored in blue (subunit a) and purple (subunit b). The  
281 molecular surface electrostatic charges are shown. Ligands are represented as spheres. Amino  
282 acid residues that interact with ligands through H-bonds are represented as sticks. The figure  
283 is an original creation designed by Ortiz-Álvarez J. (co-author of this work) performed with  
284 the Discovery Studio 2020 Client and LigProt+ software.

285

286

287

288

289

290

291

292

293

294

295

**Table 5**

Docking data results of the binding mode between atorvastatin, 1c and 5b compounds on the catalytic site of CgHMGR.

| Compound     | Docked energy (kcal/mol) | Interacting residues                                                                                                              | Residues with polar interactions | Residues with hydrophobic interactions                                                                     | Reference                 |
|--------------|--------------------------|-----------------------------------------------------------------------------------------------------------------------------------|----------------------------------|------------------------------------------------------------------------------------------------------------|---------------------------|
| a-sarone     | -4.53                    | Glu93, Lys227, Hsd399                                                                                                             | Glu93, Lys227, Hsd399            |                                                                                                            | Andrade-Pavo et al., 2019 |
| Atorvastatin | $-2.13 \pm 1.107$        | Gly58, Ala59, Thr92, Glu93, Gly94, Ala188, Met189, Gly190, Met191, Asn192, Met193, Gln302, Asp303, Gly339, Gly340, Gly341, Hsd399 | Thr92, Asp303, Gly341            | Gly58, Ala59, Glu93, Gly94, Ala188, Met189, Gly190, Met191, Asn192, Met193, Gln302, Gly339, Gly340, Hsd399 | This work                 |
| 1c           | $-5.99 \pm 0.104$        | Glu93, Met189, Gly190, Met191, Asn192, Met189, Gly301, Gln302, Asp303, Pro304, Gly336, Gly339, Gly340, Gly341, Thr342, Hsd399     | Glu93, Met191, Asn192            | Met189, Gly190, Met189, Gly301, Gln302, Asp303, Pro304, Gly336, Gly339, Gly340, Gly341, Thr342, Hsd399     | This work                 |
| 5b           | $-5.71 \pm 0.004$        | Thr92, Glu93, Met189, Gly190, Met191, Gly301, Gln302, Asp303, Pro304, Gly339, Gly340, Gly341, Thr342                              | Met191, Asp303                   | Thr92, Glu93, Met189, Gly190, Gly301, Gln302, Pro304, Gly339, Gly340, Gly341, Thr342                       | This work                 |

## 1           **DISCUSSION**

2           The problem of drug-resistant strains will always exist due to the process of natural  
3 evolution and selection of yeasts and bacteria [25]. Therefore, the probability of applying an  
4 effective treatment to patients would be increased by having a broad battery of antifungal  
5 agents from which to choose as well as distinct molecular targets among such drugs.

6           The HMGR enzyme (particularly CgHMGR) has for some time been proposed as a  
7 possible target, leading to the study of some cholesterol-lowering drugs (e.g., simvastatin and  
8 atorvastatin) as inhibitors of the growth of pathogenic yeasts [10,26]. According to *in vitro*  
9 evolutionary experiments, treatment of *C. glabrata* with some statins may allow for the  
10 selection of mutants. However, gene sequencing has not detected any changes in the catalytic  
11 domain of CgHMGR, indicating no effect on HMGR activity. *C. glabrata* is a useful model  
12 for examining resistance to statins and the precise molecular mechanisms of resistance to  
13 compounds that inhibit the CgHMGR enzyme [5].

14          In the current effort, three series of compounds were evaluated as inhibitors of *C.*  
15 *glabrata*. Two of the best derivatives were selected to determine their effect on yeast growth  
16 and ergosterol synthesis. Complementary studies were carried out with yeast growth rescue  
17 assays and docking simulations.

18          The compounds presently investigated were originally designed as lipid-lowering [11]  
19 and anti-inflammatory agents [12]. Their chemical structure could plausibly enable them to  
20 inhibit the activity of the CgHMGR enzyme. In fact, substituted pyrroles have been  
21 considered as antifungals [13,23] and their fungicidal activity is reported. However, the  
22 possible molecular target has not been previously explored in an in-depth manner.

23 Compounds such as statins (e.g., simvastatin and atorvastatin) and fibrates that inhibit  
24 HMGR have been administered to lower cholesterol levels in humans [27]. Additionally,  
25 they have been assessed as growth inhibitors of *Candida* spp., *Aspergillus* spp. and *Ustilago*  
26 *maydis* [7-10,14,26]. Based on its hypercholesterolemic activity,  $\alpha$ -asarone underwent initial  
27 studies [27,28] that resulted in a finding of high toxicity. Thus, new derivative compounds  
28 have been designed and synthesized, and these have produced good activity against different  
29 fungi, such as *C. glabrata* and *Ustilago maydis* [9,14].

30 When the test compounds were examined *in vitro*, the growth inhibition of both strains  
31 of *C. glabrata* was better for **1c** than **5b** and  $\alpha$ -asarone. On the other hand, **5b** did not induce  
32 a greater growth inhibition than its reference compound, atorvastatin. The latter statin,  
33 bearing a substituted pyrrolic ring, has already been proposed as an antifungal agent to inhibit  
34 the growth of *Candida* spp. [26]. Although the antifungal activity of **1c** has already been  
35 studied [11], this is the first evaluation, to our knowledge, of its effect on an opportunistic  
36 pathogenic yeast. Furthermore, the current investigation constitutes the first in-depth  
37 exploration of the mechanism of action and molecular target of the inhibitors.

38 According to the yeast growth rescue experiment, the test compounds likely inhibited  
39 the pathway for sterol biosynthesis [9,26]. The addition of ergosterol to *C. glabrata* CBS 138  
40 resulted in a recovery of growth at a level below that of the control (without treatment with  
41 an inhibitor), while its addition to *C. glabrata* 43 led to growth that overcame the control  
42 level. This behavior can be explained by what is observed in the fluconazole-resistant *C.*  
43 *glabrata* strains, in which the consumption and metabolism of sterols might be affected by  
44 mutations in the *ERG11* gene. Moreover, the exposure of susceptible *C. glabrata* strains to  
45 fluconazole (an inhibitor of ergosterol synthesis) causes a coordinated action between the

46 consumption and production of ergosterol. Hence, the present test compounds probably  
47 inhibit the pathway for sterol biosynthesis, as fluconazole does [30,31].

48 Since **1c** and **5b** inhibited ergosterol synthesis, they may reduce the activity of the  
49 CgHMGR enzyme [26]. A better inhibition of the production of ergosterol was found for **1c**  
50 in both strains of *C. glabrata* compared to its control ( $\alpha$ -asarone) and **5b**. Of these  
51 compounds, **1c** had the lowest IC<sub>50</sub>. Previous publications have documented the capability of  
52 simvastatin,  $\alpha$ -asarone, and derivatives of the latter to inhibit recombinant CgHMGR [8,9].

53 A correlation has been detected in *C. albicans* strains between their sensitivity to azoles  
54 and their total ergosterol concentration [15]. Therefore, it was important to demonstrate that  
55 the test compounds were capable of inhibiting the synthesis of ergosterol in both strains of  
56 *C. glabrata* (the fluconazole- susceptible and -resistant strains).

57 The experimental results from the assays on yeast growth inhibition and the inhibition  
58 of ergosterol synthesis were complemented by docking simulations based on molecular  
59 coupling between the test compounds and CgHMGR. The binding energy values calculated  
60 for **1c** and **5b** were congruent with the *in vitro* findings for these two compounds. **1c** exhibited  
61 the lowest binding energies and the best *in vitro* inhibition of yeast growth. Better binding to  
62 the active site of CgHMGR was displayed by **1c** and **5b** than  $\alpha$ -asarone and its derivatives,  
63 based on the calculated binding energies of the present study for the former two and reports  
64 in the literature for the latter [9]. This supports the *in vitro* results, in which **1c** and **5b** showed  
65 the greatest inhibition of yeast growth and of ergosterol synthesis.

66 The high binding energy determined from the docking of **1c** and **5b** into the active site  
67 of CgHMGR may stem from the addition of the ester and hydroxyl groups to the molecule,  
68 elements that do not exist in the structure of  $\alpha$ -asarone. The hydroxyl group of **1c** might play

69 a crucial role in the proper binding mode of the compounds with HMGR [28,29]. Perhaps  
70 the chemical structure also confers a strong binding mode, considering the generation of  
71 hydrogen bonds with a short distance between atoms. On the other hand, the unsuitable  
72 binding mode of atorvastatin with CgHMGR possibly owes itself to steric interference of the  
73 chemical structure with a proper approach to the catalytic site of HMGR, as well as to the  
74 longer distance of the hydrogen bonds observed in the atorvastatin-CgHMGR complex (19.7  
75 and 22.9 Å), which would confer weaker binding. Actually, atorvastatin has exhibited weak  
76 binding energy (-2.89 kcal/mol) with the catalytic site of human HMGR [32], substantiating  
77 the results obtained in this work with atorvastatin and CgHMGR. Interestingly,  $\alpha$ -asarone,  
78 simvastatin and the substrate HMG-CoA presented almost identical high binding energy for  
79 the catalytic site of human HMGR [29]. Hence, the structural differences between human  
80 HMGR and CgHMGR may influence the binding mode.

81 Molecular modeling of proteins is a useful analytical technique that in the future should  
82 allow for the characterization of mutants in the *CgHmgr* gene, a phenotype resistant to  
83 antifungal inhibitors of the HMGR enzyme. Such resistance could be explained by changes  
84 in the protein related to its tertiary structure or by the capacity of inhibitors to bind with the  
85 amino acids of the catalytic site, among other possibilities. Indeed, molecular modeling  
86 analysis and mutations in the *ERG11* gene, encoding for the enzyme 14-alpha-lanosterol  
87 demethylase (CYP51), have already been carried out with distinct *C. albicans* strains. Thus,  
88 a molecular explanation can be provided for the resistance or sensitivity of these strains to  
89 different azoles [33].

90

91

## 92 CONCLUSIONS

93 Three series of plausible inhibitors of the CgHMGR enzyme were designed, synthesized and  
94 tested for the inhibition of yeast growth. The two best candidates, **1c** (structurally related to  
95 fibrates) and **5b** (structurally related to atorvastatin), were chosen for further experiments.  
96 When comparing the results of these two compounds, treatment with the former led to a  
97 greater inhibition of yeast growth and ergosterol synthesis. The fact that the target of **1c** is  
98 the pathway for the synthesis of ergosterol was demonstrated by the decrease it caused in the  
99 level of ergosterol as well as the posterior rescue of yeast viability by the addition of  
100 exogenous ergosterol. According to the docking analysis, the present test compounds  
101 displayed a better binding mode with CgHMGR than  $\alpha$ -asarone and atorvastatin, supporting  
102 the experimental results.

103 There are many advantages to the rational design of antifungal compounds that are  
104 derived from known drugs (statins, fibrates, etc.), have a defined chemical structure, and are  
105 directed at a specific target. Their pharmacokinetics and pharmacodynamics can be inferred,  
106 suggesting potential redesign strategies to make them more specific, more potent and less  
107 toxic. Based on the molecular modeling analysis, a plausible interaction of the inhibitory  
108 compound with the target protein is visualized and analyzed, thus providing insights into the  
109 possible mechanisms of resistance of a yeast to an antifungal agent. Such resistance might be  
110 explained on the basis of changes in the tertiary structure of the protein or in the binding  
111 mode of inhibitors with their target. The fibrate-related compound, **1c**, herein proved to be a  
112 good candidate for further research on its antifungal activity. Modifications of the compound  
113 should be considered to achieve greater specificity and potency. The derivatives could then

114 be examined with *in vivo* animal models at a therapeutic dose. Other important areas to be  
115 explored are its toxicity and the inhibition of the recombinant CgHMGR enzyme.

116

## 117 **MATERIALS AND METHODS**

### 118 **Strains and culture media**

119 *C. glabrata* CBS 138 and *C. glabrata* 43 are susceptible and resistant to fluconazole,  
120 respectively [9]. They were employed to examine the antifungal effect and ergosterol  
121 inhibition produced by the current test compounds. *C. glabrata* CBS 138 was donated by Dr.  
122 Bernard Dujon of the Pasteur Institute, Paris. *C. glabrata*, *C. albicans* and *C. krusei* strains  
123 were stored at -70 °C in 50% (v/v) anhydrous glycerol (Sigma-Aldrich). They were recovered  
124 in yeast extract-peptone-dextrose (YPD) medium (1% yeast extract, 2% casein peptone, and  
125 2% dextrose anhydrous powder; J.T. Baker) at 37 °C under orbital shaking at 120 rpm, to be  
126 used as inoculum in the assays. The RPMI-1640 medium (Sigma-Aldrich) was prepared in  
127 accordance with the standard procedures of the Clinical and Laboratory Standards Institute  
128 (CLSI). For growth rescue assays, stock solutions of the yeasts were elaborated at a final  
129 concentration of 2.5% (v/v) in a mixture of Tween 80 and ethanol (1:1) (Sigma-Aldrich).

### 130 **Evaluation of the growth inhibition of *C. albicans* and *C. glabrata***

131 To identify the compounds with the greatest potential antifungal activity, all the compounds  
132 in the three series were examined, together with three reference compounds (fluconazole,  $\alpha$ -  
133 asarone and simvastatin), for their effect on the growth of two strains of *C. albicans* and two  
134 strains of *C. glabrata*. Yeast cells were cultured in slightly stirred YPD medium at 37 °C for  
135 24 h, and later adjusted to a density of 0.5 ( $A_{S600}$ ) to obtain a new inoculum. A stock solution,  
136 prepared with dimethyl sulfoxide (DMSO) and 10 mM of each of the inhibitors, was added



137 (50  $\mu$ L) in a Petri dish to afford a final inhibitor concentration of 50, 300 or 600  $\mu$ M.  
138 Subsequently, YPD medium (25 mL) was added, and the mixture was slightly stirred until a  
139 homogenous solid was formed. The solidified media were inoculated with 20  $\mu$ L of each of  
140 the *Candida* strains, previously adjusted, in a section of the Petri dish and incubated at 37 °C  
141 for 24 h [14]. Based on this procedure, two inhibitors were selected for further experiments,  
142 **1c** from the fibrates derivatives and **5b** from the substituted pyrroles.

#### 143 **In vitro activity of the synthetic compounds against *Candida* spp.**

144 The effect of **1c** and **5b** on the growth of *C. glabrata* CBS 138 and *C. glabrata* 43 was  
145 evaluated by using the CLSI M27-A3 microdilution method. Briefly, stock solutions of  
146 antifungal compounds were prepared, from which the experimental concentrations were  
147 obtained in RPMI-1640 medium (Sigma-Aldrich). Fluconazole, simvastatin, atorvastatin and  
148  $\alpha$ -asarone served as reference compounds for examining susceptibility. *C. albicans* ATCC  
149 10231 and *C. krusei* ATCC 14423 were the controls for sensitivity and resistance,  
150 respectively. The synthetic compounds were dissolved in DMSO at the time they were placed  
151 on the microplates, followed by incubation for 24 h at 37 °C. The volume of the solvent was  
152 less than 10% of the total volume to avoid problems of inhibition by the solvent. Growth was  
153 quantified by optical density in a Thermo Scientific™ Multiskan™ FC microplate  
154 spectrophotometer at 620 nm. The values of yeast growth are expressed as the average of  
155 three independent assays.

#### 156 ***Candida glabrata* growth rescue**

157 To verify that inhibitors affect yeast viability by inhibiting ergosterol synthesis, a growth  
158 rescue experiment was conducted. Growth was first stopped by subjecting yeasts to the  
159 sublethal concentration (IC<sub>70-90</sub>) of one of the inhibitors, determined by the CLSI M27-A3

160 protocol (see section 2.3), and then ergosterol was added. Briefly, to each well of 96-well  
161 microplates were added 100  $\mu$ L of one of the antifungal solutions (2x) prepared in RPMI-  
162 1640 medium (Sigma-Aldrich), followed by 80  $\mu$ L of a yeast suspension adjusted to 1-5 x  
163  $10^6$  UFC/mL and diluted 1:1000 with RPMI-1640 medium (Sigma-Aldrich). A stock solution  
164 of ergosterol was prepared by dissolving 11  $\mu$ g/mL in Tween 80/ethanol, and 20  $\mu$ L of this  
165 solution was added to each well. The controls were yeasts cultured without any inhibitor  
166 (growth control) and those with an inhibitor but without sterol (growth rescue control).

### 167 **Statistical analysis**

168 Data are expressed as the mean of three replicates  $\pm$  standard deviation (SD). Differences  
169 between groups were examined with two-way analysis of variance (ANOVA), with the  
170 Bonferroni correction, and a 95% confidence interval. Statistical analyses were performed  
171 and graphs constructed with GraphPad Prism 5.0. Statistical significance was considered at  
172  $P < 0.001$ .

### 173 **Ergosterol quantification**

174 Total sterols were extracted with a slightly modified version of the methodology reported by  
175 Arthington-Skaggs *et al.* [15]. Briefly, *C. glabrata* yeasts were grown in YPD medium by  
176 incubation at 37 °C for 24 h under constant agitation at 200 rpm. The cell culture was  
177 prepared by adjusting it to a density of 0.3 ( $A_{600}$ ) in different flasks containing 5 mL of YPD  
178 medium, followed by the addition of DMSO solvent as the control (Sigma-Aldrich, USA) or  
179 one of the inhibitors (simvastatin,  $\alpha$ -asarone, **1c** or **5b** at 50, 150, 300 or 600  $\mu$ M). For each  
180 treatment, the yeasts were incubated at 37 °C for 18 h under constant shaking at 200 rpm.  
181 Cells were harvested by centrifugation and washed with distilled water. After establishing  
182 the net weight of the pellet, it was mixed with 3 mL of an alcoholic solution of potassium

183 hydroxide (KOH) (25 g of KOH and 35 mL of distilled water, brought to 100 mL with  
184 absolute ethanol) in a vortex for 1 min to extract the sterols [14-16]. The cell suspensions  
185 were incubated at 85 °C for 1 h, and then the sterols were extracted with a mixture of 1 mL  
186 of sterile distilled water and 3 mL of *n*-heptane by vigorously mixing in a vortex for 3 min.  
187 The *n*-heptane layer was spectrophotometrically scanned between 230 and 300 nm  
188 (BioSpectrometer, Eppendorf). The presence of ergosterol (As<sub>281.5</sub> peak) and 24 (28)  
189 dihydroxy-ergosterol (24 (28) DHE), a late intermediate (As<sub>230</sub> peak), can be appreciated by  
190 the characteristic four-peaked spectrum indicating sterol absorption. The technique is also  
191 capable of revealing a decrease in the level of ergosterol. The absence of detectable levels is  
192 evidenced by a flattening of the curve [14-16].

### 193 **Docking of the test compounds on CgHMGR**

194 The hypothetical three-dimensional structure of CgHMGR was obtained by homology  
195 modeling with MODELLER 9.13 software [17], using the crystallographic structure of  
196 human HMGR as the template (PDB entry: 1DQ8). The quality of the resulting model was  
197 evaluated by determining the stereochemical restrictions with a Ramachandran plot  
198 constructed on Procheck v.3.5.4 [18]. The structure was energetically minimized and  
199 equilibrated through molecular dynamic simulations on the NAMD2 program [19], which  
200 were performed in 2,000,000 steps for a total run time of 1 ns. The three-dimensional  
201 structure of the ligands, obtained with the ChemSketch program ([www.acdlabs.com](http://www.acdlabs.com)), was  
202 subjected to energy optimization and minimization with AVOGADRO software [20].  
203 Docking simulations were conducted on AUTODOCK 4 [21], employing the parameters  
204 established by Andrade-Pavón *et al.* [9]. Docking results were computed based on a total of

205 100 runs and 1,250,000,000 generations, analyzed in AutodockTools and visualized on  
206 LigProt+ software [22].

### 207 Synthesis of the compounds tested as potential antifungal agents

208 The fibrate-based derivatives **1a-c**, **2a-c** and **3a-c**, and 1,2-dihydroquinolines **4a-d**, constituted  
209 the first two series of compounds [11] (Figure 5). The substituted pyrrole derivatives  
210 comprised the third series, being **5a-d** and **6b-d** [12] (Figure 6). The brominated pyrroles **5b**,  
211 **5c** and **6b-d** were designed because of its similarity to some pyrrole-based marine alkaloids  
212 known to exert both antifungal and antibacterial activity [13, 23-24].

213

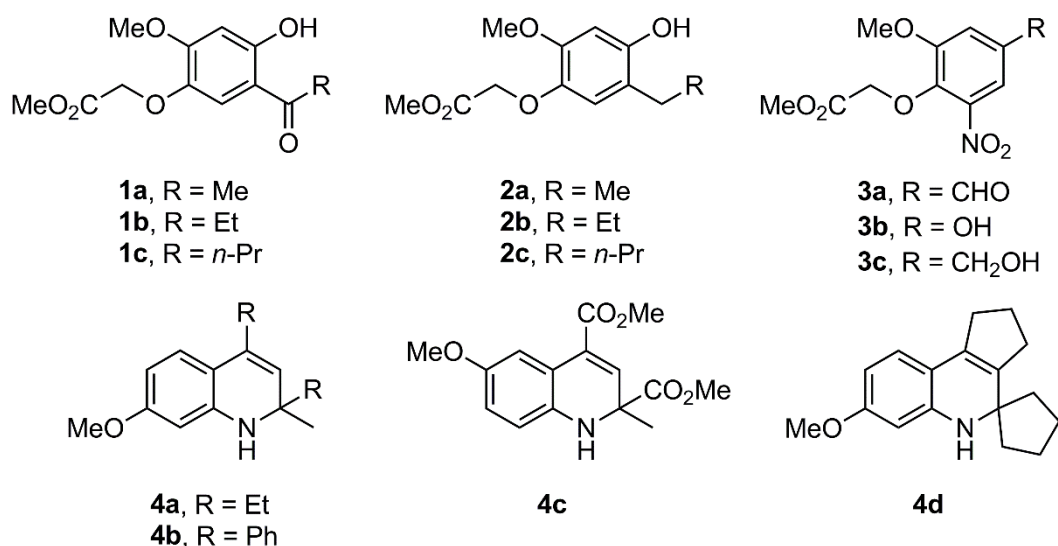

214

215 **Figure 5.** Structures of the fibrate-based analogues **1a-c**, **2a-c** and **3a-c** (series 1), and 1,2-  
216 dihydroquinolines **4a-d** (series 2) [11].

217

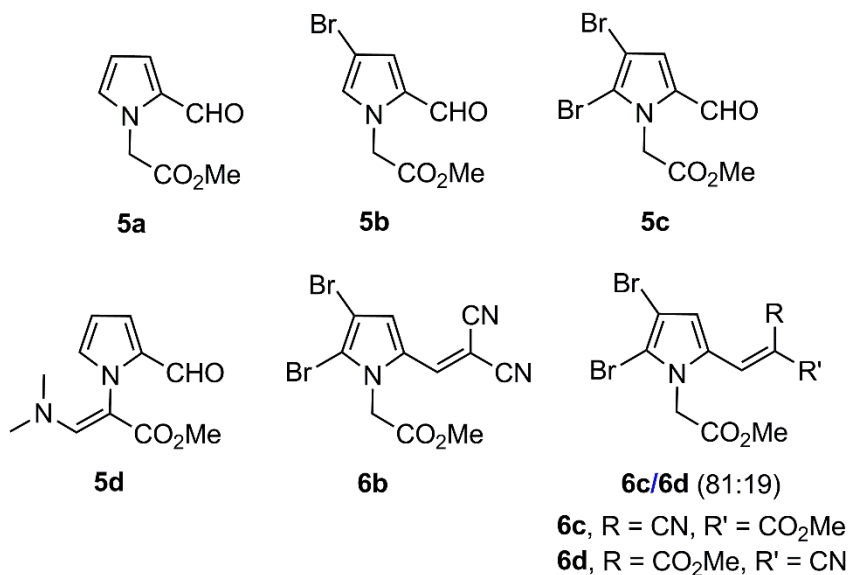

218

219

220 **Figure 6.** Structures of the substituted pyrroles **5a-d** and **6b-d** (series 3) [12].

221

### 222 **Synthesis of bromopyrroles 5b and 5c**

223 The synthesis of **5a**, **5d** and **6c-d** has been previously reported [11,12]. The preparation of  
224 bromopyrroles **5b** and **5c** was achieved by treatment of compound **5a** [12] with *N*-  
225 bromosuccinimide (NBS) as the brominating agent under mild reaction conditions (Scheme  
226 1). Even though 1.0 mol equivalent of NBS was employed, a mixture of bromopyrroles **5b**  
227 and **5c** was obtained. Due to the fact that they were easily separated by column  
228 chromatography, an excess of NBS (2.5 mol equiv.) was added to the reaction mixture to  
229 give **5b** and **5c** in 32% and 58% yields, respectively.

230

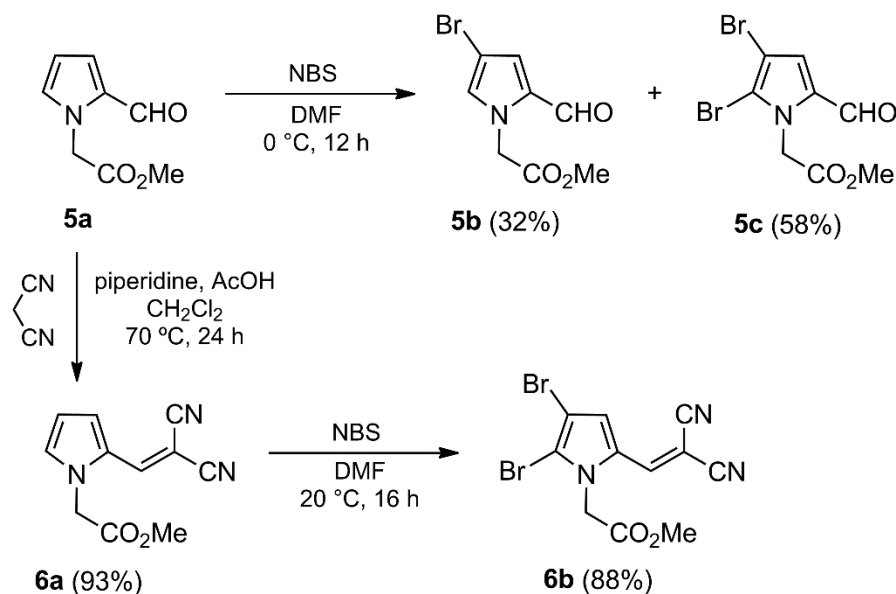

**Scheme 1.** Synthesis of 4-bromopyrroles **5b**, **5c** and **6b** from pyrrole **5a**.

235

236 The synthesis of dibromopyrrole **6b** was carried out by a two-step methodology. The first  
237 step consisted of a Knoevenagel reaction of **5a** with malononitrile under acid conditions [12]  
238 to provide **6a** in high yield (Scheme 1). Bromination of the latter with NBS (2.0 mol equiv.)  
239 in DMF, as the solvent, led to the desired product **6b** in good yield (88%) (Scheme 1).

240

### General information

241

242 Melting points were determined on a Krüss KSP 1N capillary melting point apparatus. IR  
243 spectra (ATR-FT or KBr) were recorded on a Perkin-Elmer 2000 spectrophotometer. <sup>1</sup>H  
244 and <sup>13</sup>C NMR spectra were captured on a Varian Mercury (300 MHz) instrument, with  
245 CDCl<sub>3</sub> as the solvent and TMS as internal standard. Signal assignments were based on 2D  
246 NMR spectra (HMQC and HMBC). High-resolution mass spectra (HRMS) were obtained  
(in electron impact mode) on a Jeol JSM-GCMateII spectrometer. Analytical thin-layer

247 chromatography was carried out using E. Merck silica gel 60 F254 coated 0.25 plates,  
248 visualized by using a long- and short-wavelength UV lamp. Flash column chromatography  
249 was conducted over Natland International Co. silica gel (230-400 and 230-400 mesh). All  
250 air moisture sensitive reactions were carried out under N<sub>2</sub> using oven-dried glassware.  
251 CH<sub>2</sub>Cl<sub>2</sub> and DMF (Sigma-Aldrich) were distilled over CaH<sub>2</sub> (Sigma-Aldrich) prior to use.  
252 All other reagents (Sigma-Aldrich) were employed without further purification.

253

### 254 **Synthesis of bromopyrroles 5b and 5c**

255 *Methyl 2-(4-bromo-2-formyl-1H-pyrrol-1-yl)acetate (5b)*. *Methyl 2-(2,3-dibromo-5-formyl-*  
256 *1H-pyrrol-1-yl)acetate (5c)*. To a stirring solution of **5a** (0.100 g, 0.60 mmol) in anhydrous  
257 DMF (5 mL) at 0 °C, a solution of NBS (0.267 g, 1.50 mmol) in anhydrous DMF (2 mL) was  
258 added dropwise, and the mixture stirred at 0 °C for 12 h. A mixture of water/hexane/EtOAc  
259 (1:0.5:0.5) (20 mL) was added, the organic layer dried (Na<sub>2</sub>SO<sub>4</sub>) and the solvent removed  
260 under vacuum. The residue was purified by column chromatography over silica gel (30 g/g  
261 crude, hexane/EtOAc, 9:1) leading to **5b** (0.062 g, 32%) as a yellow solid and **5c** (0.112 g,  
262 58%) as a yellow oil.

263 Data of **5b**: R<sub>f</sub> 0.43 (hexane/EtOAc, 7:3); mp 203-205 °C. IR (film):  $\bar{\nu}$  3121, 2954, 1754,  
264 1666, 1392, 1365, 1219, 1092, 923, 771 cm<sup>-1</sup>. <sup>1</sup>H NMR (300 MHz, CDCl<sub>3</sub>):  $\delta$  3.78 (s, 3H,  
265 CO<sub>2</sub>CH<sub>3</sub>), 5.03 (s, 2H, CH<sub>2</sub>), 6.92 (br dd, *J* = 1.8, 1.2 Hz, 1H, H-5'), 6.98 (d, *J* = 1.8 Hz, 1H,  
266 H-3'), 9.47 (d, *J* = 0.9 Hz, 1H, CHO). <sup>13</sup>C NMR (75.4 MHz, CDCl<sub>3</sub>):  $\delta$  50.1 (CH<sub>2</sub>), 52.7  
267 (CO<sub>2</sub>CH<sub>3</sub>), 97.5 (C-4'), 125.2 (C-3'), 131.2 (C-5'), 131.6 (C-2'), 168.2 (CO<sub>2</sub>CH<sub>3</sub>), 179.3  
268 (CHO). HRMS (EI): *m/z* [M<sup>+</sup>] calcd for C<sub>8</sub>H<sub>8</sub>BrNO<sub>3</sub>: 244.9688; found: 244.9690.

269 Data of **5c**: *R<sub>f</sub>* 0.69 (hexane/EtOAc, 7:3); IR (film):  $\bar{\nu}$  2955, 1755, 1668, 1450, 1397, 1363,  
270 1218, 1005, 810, 776  $\text{cm}^{-1}$ .  $^1\text{H}$  NMR (300 MHz,  $\text{CDCl}_3$ ):  $\delta$  3.78 (s, 3H,  $\text{CO}_2\text{CH}_3$ ), 5.25 (s,  
271 2H,  $\text{CH}_2$ ), 7.05 (s, 1H, H-4'), 9.32 (s, 1H, CHO).  $^{13}\text{C}$  NMR (75.4 MHz,  $\text{CDCl}_3$ ):  $\delta$  49.0 ( $\text{CH}_2$ ),  
272 52.7 ( $\text{CO}_2\text{CH}_3$ ), 101.1 (C-3'), 118.6 (C-5'), 125.3 (C-4'), 132.4 (C-2'), 167.5 ( $\text{CO}_2\text{CH}_3$ ),  
273 178.2 (CHO). HRMS (EI): *m/z* [ $\text{M}^+$ ] calcd for  $\text{C}_8\text{H}_7\text{Br}_2\text{NO}_3$ : 322.8793; found: 322.8791.

274

### 275 **Synthesis of pyrroles **6a** and **6b****

276 *Methyl 2-(2-(2,2-dicyanovinyl)-1H-pyrrol-1-yl)acetate (6a)*. In a threaded ACE glass  
277 pressure tube with a sealed Teflon screw cap and magnetic stirring bar, a solution of **5a** (0.100  
278 g, 0.60 mmol), malononitrile (0.044 g, 0.66 mmol), piperidine (0.026 g, 0.30 mmol) and  
279 glacial AcOH (0.029 g, 0.48 mmol) in anhydrous  $\text{CH}_2\text{Cl}_2$  (5 mL) was heated at 70 °C for 24  
280 h. The reaction mixture was diluted with  $\text{CH}_2\text{Cl}_2$  (50 mL) and washed with water (25 mL)  
281 and an aqueous saturated solution of  $\text{NaHCO}_3$  until neutral. The organic layer was dried  
282 ( $\text{Na}_2\text{SO}_4$ ) and the solvent removed under vacuum. The residue was purified by column  
283 chromatography over silica gel (20 g/g crude, hexane/EtOAc, 9:1) to afford **6a** (0.12 g, 93%)  
284 as a yellow solid. *R<sub>f</sub>* 0.51 (hexane/EtOAc, 8:2); mp 203-205 °C. IR (KBr):  $\bar{\nu}$  3132, 2992,  
285 2220, 1751, 1583, 1476, 1399, 1350, 1328, 1239, 1169, 1132, 1088, 994, 758, 732  $\text{cm}^{-1}$ .  $^1\text{H}$   
286 NMR (300 MHz,  $\text{CDCl}_3$ ):  $\delta$  3.83 (s, 3H,  $\text{CO}_2\text{CH}_3$ ), 4.80 (s, 2H,  $\text{CH}_2\text{CO}_2\text{Me}$ ), 6.49 (ddd, *J* =  
287 4.5, 2.4, 0.6 Hz, 1H, H-4'), 7.10 (dd, *J* = 2.4, 1.5 Hz, 1H, H-5'), 7.38 (s, 1H, H-1''), 7.73  
288 (ddd, *J* = 4.5, 1.5, 0.6 Hz, 1H, H-3').  $^{13}\text{C}$  NMR (75.4 MHz,  $\text{CDCl}_3$ ):  $\delta$  48.3 ( $\text{CH}_2\text{CO}_2\text{Me}$ ),  
289 53.3 ( $\text{CO}_2\text{CH}_3$ ), 72.5 (C-2''), 113.4 (C-4'), 114.0 (CN), 115.3 (CN), 121.1 (C-3'), 127.2 (C-  
290 2'), 131.6 (C-5'). 142.7 (C-1''), 167.3 ( $\text{CO}_2\text{CH}_3$ ). HRMS (EI): *m/z* [ $\text{M}^+$ ] calcd for  $\text{C}_{12}\text{H}_9\text{N}_3\text{O}_2$ :  
291 215.0695; found: 215.0694.



292 **Methyl 2-(2,3-dibromo-5-(2,2-dicyanovinyl)-1H-pyrrol-1-yl)acetate (6b)**

293 To a stirring solution of **6a** (0.100 g, 0.47 mmol) in anhydrous DMF (3 mL) at 0 °C, a solution  
294 of NBS (0.166 g, 0.93 mmol) in anhydrous DMF (3 mL) was added dropwise, and the  
295 mixture stirred at 20 °C for 16 h. A mixture of water/hexane/EtOAc (0.5:1:1) (30 mL) was  
296 added, the organic layer dried (Na<sub>2</sub>SO<sub>4</sub>) and the solvent removed under vacuum. The residue  
297 was purified by column chromatography over silica gel (20 g/g crude, hexane/EtOAc, 7:3)  
298 to give **6b** (0.25 g, 88%) as a yellow solid. R<sub>f</sub> 0.44 (hexane/EtOAc, 8:2); mp 267-269 °C. IR  
299 (KBr):  $\bar{\nu}$  3004, 2956, 2223, 1741, 1583, 1420, 1391, 1339, 1243, 1167, 1125, 1004, 983, 815,  
300 738, 687 cm<sup>-1</sup>. <sup>1</sup>H NMR (300 MHz, CDCl<sub>3</sub>):  $\delta$  3.85 (s, 3H, CO<sub>2</sub>CH<sub>3</sub>), 4.89 (s, 2H,  
301 CH<sub>2</sub>CO<sub>2</sub>Me), 7.31 (d, *J* = 0.3 Hz, 1H, H-1''), 7.76 (d, *J* = 0.3 Hz, 1H, H-4'). <sup>13</sup>C NMR (75.4  
302 MHz, CDCl<sub>3</sub>):  $\delta$  47.8 (CH<sub>2</sub>CO<sub>2</sub>Me), 53.5 (CO<sub>2</sub>CH<sub>3</sub>), 75.1 (C-2''), 104.8 (C-3'), 113.3 (CN),  
303 114.4 (CN), 118.6 (C-5'), 121.5 (C-4'), 128.3 (C-2'), 141.4 (C-1''), 166.1 (CO<sub>2</sub>CH<sub>3</sub>). HRMS  
304 (EI): *m/z* [M<sup>+</sup>] calcd for C<sub>11</sub>H<sub>7</sub>Br<sub>2</sub>N<sub>3</sub>O<sub>2</sub>: 370.8905; found: 370.8905.

305

306 **Reference compounds for the tests of the three series of potential antifungal**  
307 **compounds 1a-c, 2a-c, 3a-c, 4a-d, 5a-d and 6b-d**

308 Depending on the experiment, different inhibitors served as the reference compounds.  
309 In the case of sensitivity tests and docking analysis,  $\alpha$ -asarone was the control for the fibrate-  
310 based derivatives **1a-c**, **2a-c**, **3a-c** (series 1) and 1,2-dihydroquinolines **4a-d** (series 2) and  
311 atorvastatin for the substituted pyrroles **5a-d** and **6b-d** (series 3). In the experiment to  
312 determine the effect of the compounds on the biosynthesis of ergosterol, simvastatin and  $\alpha$ -  
313 asarone were employed. It has been reported that these two compounds are capable of  
314 inhibiting recombinant Cg-HMGR, thus affecting the production of ergosterol [9].



- 336 [3] Villanueva-Lozano H, Treviño-Rangel RDJ, González GM, Ramírez-Elizondo MT, Lara-  
337 Medrano R, Aleman-Bocanegra MC, et al. 2021. Outbreak of *Candida auris* infection in  
338 a COVID-19 hospital in Mexico. Clin Microbiol Infect. 27(5):813-816.  
339 <https://doi.org/10.1016/j.cmi.2020.12.030>
- 340 [4] Lai CC, Chen SY, Ko WC, Hsueh PR. 2021. Increased antimicrobial resistance during  
341 COVID-19 pandemic. Int J Antimicrob Agents .106324.  
342 <https://doi.org/10.1016/j.ijantimicag.2021.106324>
- 343 [5] Subhan M, Faryal R, Macreadie, I. 2018. Statin resistance in *Candida*  
344 *glabrata*. Biotechnol Lett. 40(9):1389-1394. <https://doi.org/10.1007/s10529-018-2597-1>
- 345 [6] Spampinato C, Leonardi D. 2013. *Candida* infections, causes, targets, and resistance  
346 mechanisms: traditional and alternative antifungal agents. Biomed Res  
347 Int. 2013:204237; <https://doi.org/10.1155/2013/204237>
- 348 [7] Andrade-Pavón D, Sánchez-Sandoval E, Rosales-Acosta B, Ibarra JA, Tamariz J,  
349 Hernández-Rodríguez C, et al. 2014. The 3-hydroxy-3-methylglutaryl coenzyme-A  
350 reductases from fungi (HMGR): a proposal as a therapeutic target as a study  
351 model. Rev Iberoam Micol. 31(1):81-85. <https://doi.org/10.1016/j.riam.2013.10.004>
- 352 [8] Andrade-Pavón D, Cuevas-Hernández RI, Trujillo-Ferrara J, Hernández-Rodríguez  
353 C, Ibarra JA, Villa-Tanaca L. 2017. Recombinant 3-hydroxy 3-methyl glutaryl-CoA  
354 reductase from *Candida glabrata* (rec-CgHMGR) obtained by heterologous expression,  
355 as a novel therapeutic target model for testing synthetic drugs. Appl Biochem  
356 Biotechnol.182(4):1478-1490. <https://doi.org/10.1007/s12010-017-2412-9>
- 357 [9] Andrade-Pavón D, Ortiz-Álvarez J, Sánchez-Sandoval E, Tamariz J, Hernández-  
358 Rodríguez C, Ibarra JA, et al. 2019. Inhibition of recombinant enzyme 3-hydroxy-3-

- 359 methylglutaryl-CoA reductase from *Candida glabrata* by  $\alpha$ -asarone-based synthetic  
360 compounds as antifungal agents. J Biotechnol. 292:64-  
361 67. <https://doi.org/10.1016/j.jbiotec.2019.01.008>
- 362 [10] Westermeyer C, Macreadie IG. 2007. Simvastatin reduces ergosterol levels, inhibits  
363 growth and causes loss of mtDNA in *Candida glabrata*. FEMS Yeast Res. 7(3): 436–  
364 441. <https://doi.org/10.1111/j.1567-1364.2006.00194.x>
- 365 [11] Pucheta A, Mendieta A, Madrigal DA, Hernández-Benítez RI, Romero L, Garduño-  
366 Siciliano L, et al. 2020. Synthesis and biological activity of fibrate-based acyl-and alkyl-  
367 phenoxyacetic methyl esters and 1, 2-dihydroquinolines. Med Chem Res. 29(3):459-  
368 478. <https://doi.org/10.1007/s00044-019-02496-1>
- 369 [12] Madrigal DA, Escalante CH, Gutiérrez-Rebolledo GA, Cristobal-Luna JM, Gómez-  
370 García O, Hernández-Benitez R, et al. 2019. Synthesis and highly potent anti-  
371 inflammatory activity of licofelone and ketorolac-based 1-arylpyrrolizin-3-ones. Bioorg  
372 Med Chem. 27(20):115053. <https://doi.org/10.1016/j.bmc.2019.115053>
- 373 [13] Koyama M, Ohtani N, Kai F, Mouriguchi I, Inouye S. 1987. Synthesis and quantitative  
374 structure-activity relationship analysis of N-triiodoallyl- and N-iodopropargylazoles.  
375 New antifungal agents. J Med Chem. 30(3):552-  
376 562. <https://doi.org/10.1021/jm00386a019>
- 377 [14] Arthington-Skaggs A, Jradi H, Desai T, Morrison CJ. 1999. Quantitation of ergosterol  
378 content: novel method for determination of fluconazole susceptibility of *Candida*  
379 *albicans*. J Clin Microbiol. 37(10):3332-3337. [https://doi.org/10.1128/JCM.37.10.3332-  
380 3337.1999](https://doi.org/10.1128/JCM.37.10.3332-3337.1999)

- 381 [15] Rosales-Acosta B, Mendieta A, Zúñiga C, Tamariz J, Hernández-Rodríguez C, Ibarra-  
382 García JA, et al. 2019. Simvastatin and other inhibitors of the enzyme 3-hydroxy-3-  
383 methylglutaryl coenzyme A reductase of *Ustilago maydis* (Hmgr-Um) affect la viability  
384 of the fungus, its synthesis of sterols and mating. Rev Iberoam Micol. 36(1):1-  
385 8. <https://doi.org/10.1016/j.riam.2018.05.004>
- 386 [16] Breivik ON, Owades JL. 1957. Yeast analysis, spectrophotometric semi-  
387 microdetermination of ergosterol in yeast. J Agric Food Chem. 5(5):360-363.  
388 <https://doi.org/10.1021/jf60075a005>
- 389 [17] Eswar N., Eramian D., Webb B., Shen MY., Sali A. 2008. Protein Structure Modeling  
390 with MODELLER, p 145-159. In: Kobe B., Guss M., Huber T. (ed) Structural Proteomics.  
391 Methods in Molecular Biology, vol 426. Humana Press.
- 392 [18] Laskowski RA, MacArthur MW, Moss DS, Thornton JM. 1993. PROCHECK: a  
393 program to check the stereochemical quality of protein structures. J Appl Crystallogr.  
394 26(2):283–91. <https://doi.org/10.1107/S002188982009944>
- 395 [19] Phillips JC, Braun R, Wang W, Gumbart J, Tajkhorshid E, Villa E, et al. 2005. Scalable  
396 molecular dynamics with NAMD. J Comput Chem. 26(16):1781-  
397 802. <https://doi.org/10.1002/jcc.20289>
- 398 [20] Hanwell MD, Curtis DE, Lonie DC, Vandermeersch T, Zurek E, Hutchison GR. 2012.  
399 Avogadro: An advanced semantic chemical editor, visualization, and analysis  
400 platform. J Cheminform. 4(1):1-17. <https://doi.org/10.1186/1758-2946-4-17>
- 401 [21] Morris G, Huey R, Lindstrom W, Sanner MF, Belew RK, Goodsell DS, et al. 2009.  
402 AutoDock4 and AutoDockTools4: Automated docking with selective receptor  
403 flexibility. J Comput Chem. 30(16):2785–2791. <https://doi.org/10.1002/jcc.21256>

- 404 [22] Laskowski RA, Swindells MB. 2011. LigPlot+: multiple ligand-protein interaction  
405 diagrams for drug discovery. *J Chem Inf Model.* 51(10):2778–2786.  
406 <https://doi.org/10.1021/ci200227u>
- 407 [23] Wang MZ, Xu H, Liu TW, Feng Q, Yu SJ, Wang SH, et al. 2011. Design, synthesis and  
408 antifungal activities of novel pyrrole alkaloid analogs. *Eur J Med Chem.* 46(5):1463-  
409 1472. <https://doi.org/10.1016/j.ejmech.2011.01.031>
- 410 [24] Bailey DM, Johnson RE. 1973. Pyrrole antibacterial agents. 2. 4, 5-Dihalopyrrole-2-  
411 carboxylic acid derivatives. *J Med Chem.* 16(11):1300-  
412 1302. <https://doi.org/10.1021/jm00269a019>
- 413 [25] Ksiezopolska E, Gabaldón T. 2018. Evolutionary emergence of drug resistance  
414 in *Candida* opportunistic pathogens. *Genes.* 9(9):461.  
415 <https://doi.org/10.3390/genes9090461>
- 416 [26] Macreadie IG, Johnston G, Schollosser T, Macreadie PI. 2006. Growth inhibition  
417 of *Candida* species and *Aspergillus fumigatus* by statins. *FEMS Microbiol Lett.* 262:9-  
418 13. <https://doi.org/10.1111/j.1574-6968.2006.00370.x>
- 419 [27] Wassmann S, Faul A, Hennen B, Scheller B, Böhm M, Nickenig G. 2003. Rapid effect  
420 of 3-hydroxy-3-methylglutaryl coenzyme A reductase inhibition on coronary endothelial  
421 function. *Circ Res.* 93(9): e98-103.  
422 <https://doi.org/10.1161/01.RES.0000099503.13312.7B>
- 423 [28] Argüelles N, Sánchez-Sandoval E, Mendieta A, Villa-Tanaca L, Garduño-Siciliano L,  
424 Jiménez F, et al. 2010. Design, synthesis, and docking of  
425 highly hypolipidemic agents: *Schizosaccharomyces pombe* as a new model for

- 426 evaluating alpha-asarone-based HMG-CoA reductase inhibitors. *Bioorg Med Chem.*  
427 18(12):4238–4248. <https://doi.org/10.1016/j.bmc.2010.04.096>.
- 428 [29] Medina-Franco JL, López-Vallejo F, Rodríguez-Morales S, Castillo R, Chamorro G,  
429 Tamariz J. 2005. Molecular docking of the highly hypolipidemic agent alpha-  
430 asarone with the catalytic portion of HMG-CoA reductase. *Bioorg Med Chem Lett.*  
431 15(4):989-994. <https://doi.org/10.1016/j.bmcl.2004.12.046>
- 432 [30] Hull CM, Parker JE, Bader O, Weig M, Gross U, Warrilow AG, et al. 2012. Facultative  
433 sterol uptake in an ergosterol-deficient clinical isolate of *Candida glabrata* harboring a  
434 missense mutation in *ERG11* and exhibiting cross-resistance to azoles and amphotericin  
435 B. *Antimicrob Agents Chemother.* 56(8):4223-4232.  
436 <https://doi.org/10.1128/AAC.06253-11>
- 437 [31] Li QQ, Tsai HF, Mandal A, Walker BA, Noble JA, Fukuda Y, et al. 2018.  
438 Sterol uptake and sterol biosynthesis act coordinately to mediate antifungal resistance i  
439 n *Candida glabrata* under azole and hypoxic stress. *Mol Med Rep.* 17(5):6585-6597.  
440 <https://doi.org/10.3892/mmr.2018.8716>
- 441 [32] Son M, Baek A, Sakkiah S, Park C, John S, Lee K W. 2013. Exploration of virtual  
442 candidates for human HMG-CoA reductase inhibitors using pharmacophore modeling  
443 and molecular dynamics simulations. *PLoS One.* 8(12):  
444 e83496. <https://doi.org/10.1371/journal.pone.0083496>
- 445 [33] Warrilow AG, Mullins JG, Hull CM, Parker JE, Lamb DC, Kelly DE, et al. 2012. S279  
446 point mutations in *Candida albicans* sterol 14- $\alpha$  demethylase (CYP51) reduce in vitro  
447 inhibition by fluconazole. *Antimicrob Agents Chemother.* 56(4):2099-2107.  
448 <https://doi.org/10.1128/AAC.05389-11>

## 449 SUPPLEMENTAL MATERIAL

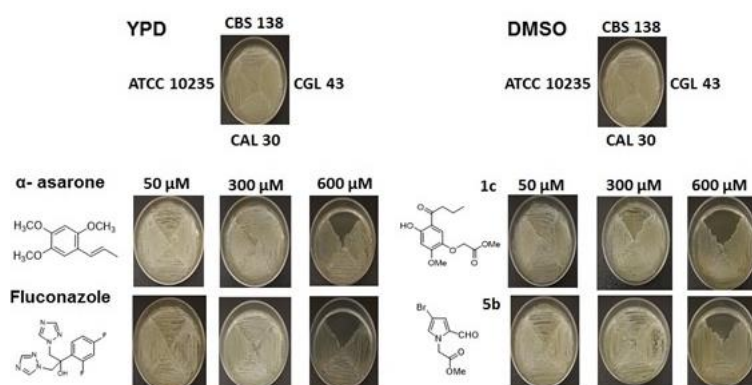

450

451

452 **Supplementary Figure 1.** Effect of the inhibitors **1c** and **5b** on yeast growth. *C. albicans*

453 (ATCC 10235, CAL30) and *C. glabrata* (CBS138, CGL43) were grown on solid YPD

454 medium with 50, 300 and 600  $\mu$ M of the inhibitors. The two *C. albicans* strains served as the

455 controls.  $\alpha$ -asarone and fluconazole were used as controls that inhibited ergosterol synthesis.

456

457

458

459

460

461

462

463

464

465



466 **Supplementary Table 1**

467 The IC<sub>50</sub> (μM) is given for each compound. This is the concentration that inhibits 50%  
468 of the ergosterol in *C. glabrata*.

469

| Inhibitor          | <i>C. glabrata</i> CBS 138 | <i>C. glabrata</i> 43 |
|--------------------|----------------------------|-----------------------|
| <b>Simvastatin</b> | 67.3                       | >600                  |
| <b>α -asarona</b>  | 117.8                      | 392.5                 |
| <b>1c</b>          | 125.1                      | 269.3                 |
| <b>5b</b>          | 230.3                      | >600                  |

470

471
